# Supplementary material for: Bacillus spp.: potent microfactories of bacterial IAA
Source: PeerJ. 2019 Jul 23;7:e7258. doi: 10.7717/peerj.7258 (PMC6659656; doi:10.7717/peerj.7258)
Supplement: Supplemental Information 2 — Data file (Effect of physiological factors, growth curve and growth promoting attributes) of the isolates. [file peerj-07-7258-s002.xlsx]

## Sheet: Effect of Temp on growth
							EFFECT OF TEMPERATURE ON BACTERIAL GROWTH
								25ºC	37ºC	45ºC
						So3II	R1	1.578	1.017	0.048
							R2	1.529	1.09	0.085
							R3	1.415	1.306	0.063
							Mean	1.50733	1.13767	0.0653333
							SD	0.0836321	0.150281	0.01861
							SE	0.048285	0.0867647	0.0107445
						Mt3b	R1	1.039	0.652	0.121
							R2	0.95	0.741	0.171
							R3	1.038	0.741	0.115
							Mean	1.009	0.711333	0.135667
							SD	0.0510979	0.0513842	0.0307463
							SE	0.0295014	0.0296667	0.0177514

## Sheet: Effect of pH on growth 
								Effect of pH on growth of bacterial isolates
									5	6	7	8	9
							So3II	R1	1.286	1.874	1.094	1.217	0.733
								R2	1.371	1.519	0.849	0.918	0.809
								R3	1.507	1.509	0.756	0.818	0.736
								Mean	1.388	1.634	0.899667	0.984333	0.759333
								SD	0.111476	0.207906	0.174603	0.207606	0.0430387
								SE	0.064361	0.120035	0.100807	0.119861	0.0248484
							Mt3b	R1	1.112	1.299	0.953	0.788	1.033
								R2	1.032	1.169	1.122	0.633	0.773
								R3	1.042	0.765	1.181	0.995	0.863
								Mean	1.062	1.07767	1.08533	0.805333	0.889667
								SD	0.0152753	0.27847	0.11834	0.181621	0.132035
								SE	0.00881917	0.160775	0.0683236	0.104859	0.0762306

## Sheet:  Growth.Curve.
								Growth Curve
							24hours	48 hours	72 hours	96 hours
					So3II	R1	1.851	1.999	1.93	1.019
						R2	1.65	1.837	1.999	0.911
						R3	1.689	1.999	1.999	0.919
						Mean	1.73	1.945	1.976	0.949667
						SD	0.106588	0.0935307	0.0398372	0.0601775
						SE	0.0615386	0.054	0.023	0.0347435
					Mt3b	R1	0.822	1.579	1.999	0.94
						R2	1.066	1.474	1.216	1.065
						R3	1.042	1.666	1.269	1.265
						Mean	0.976667	1.573	1.49467	1.09
						SD	0.134482	0.0961405	0.437569	0.163936
						SE	0.0776431	0.0555068	0.25263	0.0946485

## Sheet: IAA production potential
				IAA PRODUCTION POTENTI
				IAA With Precursor (µg/ml)	IAA Without Precursor(µg/ml)
			So3II	35.5	18
				33	18
				39	19
			Mean	35.8333	18.3333
			SD	3.01386	0.57735
			SE	1.74005	0.333333
			Mt3b	33	20
				39	22
				37	18
			Mean	36.3333	20
			SD	3.05505	2
			SE	1.76383	1.1547

## Sheet: Phosphate solubilization
							Phosphate Solubilization Index and Phosphate solubilization Efficiency( PSI AND PSE)
									Strains	PSI(mm)	PSE(%)
								So3II	R1	1.26	72.5
									R2	1.22	73
									R3	1.18	65
									Mean	1.24	72.75
								Mt3b	R1	1.31	78
									R2	1.32	78
									R3	1.28	72.5
									Mean	1.315	78

## Sheet: Siderophore production
		Siderophore Production Potential
		CAS SHUTTLE ASSAY
			%age siderophore unit
		Strains	O.D.(630nm)
		Ref. Strain	0.25
		So3II	0.188
			0.189
			0.182
		Mean	0.186333
		Mt3b	0.164
			0.162
			0.159
		Mean	0.161667

## Sheet: ACC deaminase
							ACC DEAMINASE ACTIVITY……………….
							O.D. (570nm)	ACC Conc. (mmol/L)
						So3II	0.4745	0.147
							0.4714	0.148
							0.136	0.139
						Mean	0.47295	0.1475
						Mt3b	0.4625	0.146
							0.4614	0.146
							0.4642	0.147
						Mean	0.46195	0.146

## Sheet: Effect of Temp on IAA
			AUXIN CONCENTRATION AT VARIOUS TEMPERATURE
				25ºC	37ºC	45ºC
		So3II	R1	25	60	8
			R2	21	45	7
			R3	20	43	4
			Mean	22	49.3333	6.33333
			SD	2.82843	10.6066	0
			SE	1.63299	6.12372	0
		Mt3b	R1	45	30	10
			R2	17	15	6
			R3	16	13	4
				26	19.3333	6.66667
			Mean	19.799	10.6066	0.707107
			SD	14	7.5	0.5
			SE	8.0829	4.33013	0.288675

## Sheet: IAA at G.C
									Auxin At Various Incubation periods
												µg/ml
						0 hrs	8 hrs	16 hrs	24 hrs	32 hrs	40 hrs	48 hrs	56 hrs	64 hrs	72 hrs	80 hrs	88 hrs	96 hrs
					So3II	20	40	70	242	195	175	178	172	129	114	103	103	92
						21	41	71	242	196	176	177	172	128	122	110	102	94
						21	38	65	241	196	174	173	171	132	128	112	101	98
					Mean	20.6667	39.6667	68.6667	241.667	195.667	175	176	171.667	129.667	121.333	108.333	102	94.6667
					SD	0.57735	1.52753	3.21455	0.57735	0.57735	1	2.64575	0.57735	2.08167	7.02377	4.72582	1	3.05505
					SE	0.333333	0.881917	1.85592	0.333333	0.333333	0.57735	1.52753	0.333333	1.20185	4.05518	2.72845	0.57735	1.76383
					Mt3b	25	25	165	323	242	202	208	200	156	145	132	115	90
						25	24	165	323	245	245	218	201	156	145	132	115	98
						25	22	160	322	254	241	219	199	151	144	131	112	92
					Mean	25	23.6667	163.333	322.667	247	229.333	215	200	154.333	144.667	131.667	114	93.3333
					SD	0	1.52753	2.88675	0.57735	6.245	23.7557	6.08276	1	2.88675	0.57735	0.57735	1.73205	4.16333
					SE	0	0.881917	1.66667	0.333333	3.60555	13.7154	3.51188	0.57735	1.66667	0.333333	0.333333	1	2.4037

## Sheet: Media Composition
i
					EFFECT OF MEDIA COMPOSITION ON BIOSYNTHESIS OF BACTERIAL IAA
					Control	Mt3b	So3II
				LB + tryptophan	26	76	33
					22	74	32
					18	68	28
				Mean	22	72.6667	31
				LB	26	119	125
					22	119	122
					18	121	121
				Mean	22	119.667	122.667
								YEMB + tryptophan	6	115	216
									4	110	212
									6	115	208
								Mean	5.33333	113.333	212
								%		13.3333	112
								YEMB	6	133	130
									4	132	131
									5	132	133
								Mean	5	132.333	131.333
								%		32.3333	31.3333

[truncated: 3 more sheets: Precursor, Wallng Agents Affect, Sheet2]
